# Supplementary material for: Phosphorylation of tau at Y18, but not tau-fyn binding, is required for tau to modulate NMDA receptor-dependent excitotoxicity in primary neuronal culture
Source: PubMed Central journal article supplement (PMC5438564; doi:10.1186/s13024-017-0176-x), 2017-05-19

# Supplementary Figure S4

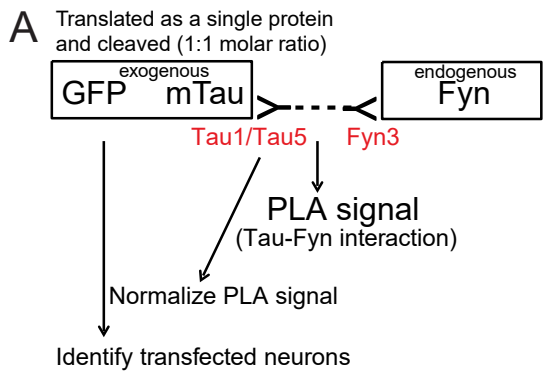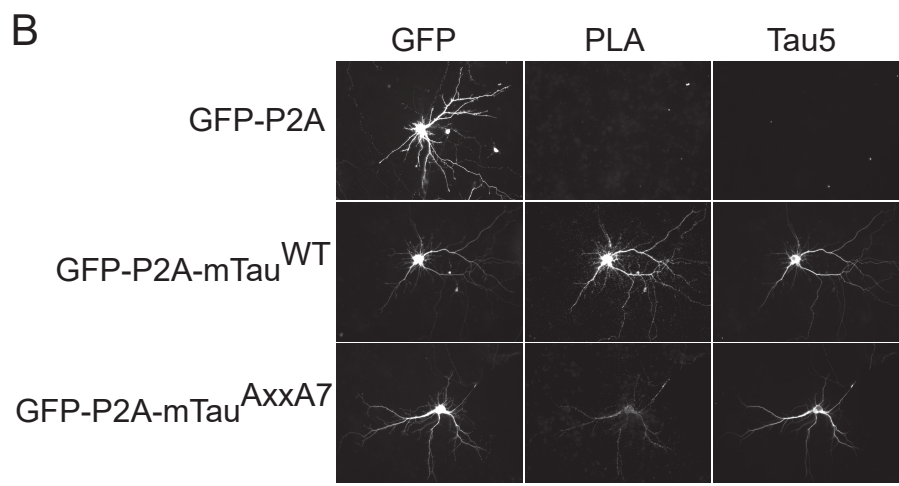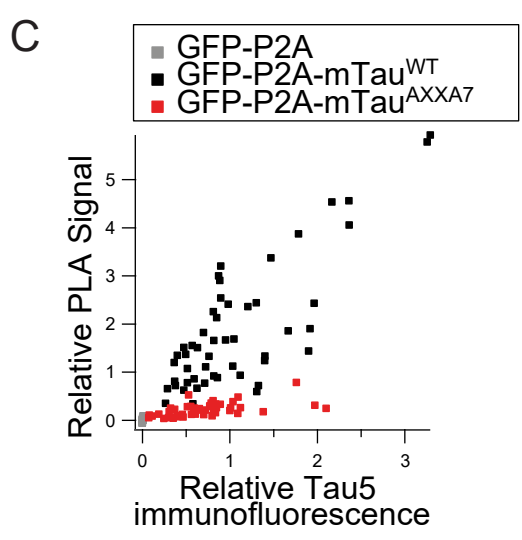

Supplement: 13024_2017_176_MOESM4_ESM.pdf [file 13024_2017_176_MOESM4_ESM.pdf]
